# Supplementary material
Source: Springer Nature journal article supplement (https://www.springermedizin.de/resource/supplementary/13690_2013_52_MOESM3_ESM.pdf/9422518)

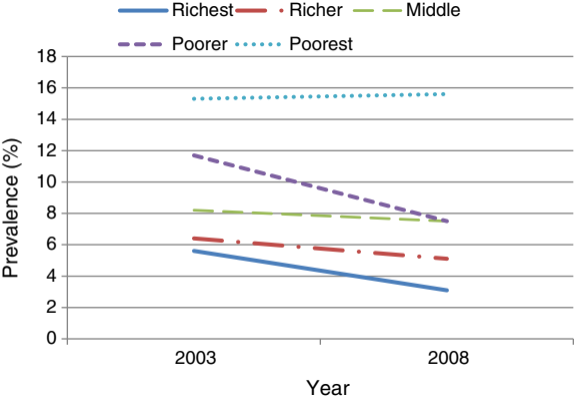

Supplement: MOESM3 [file 9422518]
